# Supplementary material for: Conspiracy mentality among informal caregivers as a risk factor for caregiver burden, mental health, perceived loneliness and social isolation during the COVID-19 pandemic: findings of a representative online study from Germany
Source: Springer Nature journal article supplement (doi:10.1007/s11136-022-03177-0), 2022-07-05
Supplement: MOESM1 [file 23242384]

**Supplementary File for the Manuscript Zwar, König, & Hajek (2022) Conspiracy mentality among informal caregivers as a risk factor for caregiver burden, mental health, perceived loneliness and social isolation during the COVID-19 pandemic: Findings of a representative online study from Germany, *Quality of Life Research*.**

**Appendix A: Missing values and additional analyses**

Table A1 gives information on frequency and percentage of missing values in the analyzed variables of this study. Table A2 provides the results of an additional structural equation analyses using full information maximum likelihood (FIML) estimation.

Table A1  
Missing values of all analyzed variables

|                                     | N (%)      |
|-------------------------------------|------------|
| Gender                              | 0          |
| Age                                 | 0          |
| Highest educational degree          | 6 (1.23)   |
| Marital status                      | 2 (0.41)   |
| Employment status                   | 2 (0.41)   |
| Living situation                    | 4 (0.82)   |
| Children in one's household         | 5 (1.02)   |
| Caregiving time (h/week)            |            |
| - No information given              | 13 (2.66)  |
| - Don't know                        | 52 (10.63) |
| Self-rated health                   | 0          |
| Perceived danger for caregiver      | 0          |
| Perceived danger for care recipient |            |
| - No information given              | 8 (1.64)   |
| - Don't know                        | 1 (0.20)   |
| Social support                      |            |
| - No information given              | 7 (1.43)   |
| - Don't know                        | 11 (2.25)  |
| Conspiracy mentality                | 21 (4.29)  |
| Social exclusion                    |            |
| - No information given              | 2 (0.41)   |
| - Don't know                        | 24 (4.91)  |
| Loneliness                          |            |
| - No information given              | 2 (0.41)   |
| - Don't know                        | 11 (2.25)  |
| Burden                              |            |
| - No information given              | 12 (2.45)  |
| - Don't know                        | 24 (4.91)  |
| Depressive symptoms                 |            |
| - No information given              | 5 (1.02)   |
| - Don't know                        | 21 (4.29)  |

Table A2

Results of structural equation models with full information maximum likelihood

|                                                          | (1)<br>Burden |               |          |          | (2)<br>Loneliness |               |          |          | (3)<br>Social exclusion |               |              |          | (4)<br>Depressive symptoms |               |          |          |
|----------------------------------------------------------|---------------|---------------|----------|----------|-------------------|---------------|----------|----------|-------------------------|---------------|--------------|----------|----------------------------|---------------|----------|----------|
|                                                          | <i>b</i>      | Robus<br>t SE | <i>z</i> | <i>p</i> | <i>b</i>          | Robus<br>t SE | <i>z</i> | <i>p</i> | <i>b</i>                | Robus<br>t SE | <i>z</i>     | <i>p</i> | <i>b</i>                   | Robus<br>t SE | <i>z</i> | <i>p</i> |
| Conspiracy mentality                                     | .10           | .04           | 3.05     | 0.002    | .01               | .00           | 3.71     | 0.000    | .02                     | .00           |              | 0.000    | .10                        | .02           | 4.81     | 0.000    |
| Gender (ref. male)                                       | 1.52          | .78           | 1.95     | 0.052    | .04               | .06           | 0.63     | 0.531    | .08                     | .06           | 6.24<br>1.36 | 0.173    | .81                        | .45           | 1.81     | 0.071    |
| Caregiving time                                          | .05           | .03           | 2.01     | 0.045    | -.00              | .00           | -1.94    | 0.053    | .00                     | .00           | 0.30         |          | .00                        | .01           | 0.12     | 0.905    |
| Social support                                           | -.36          | .08           | -4.45    | 0.000    | -.05              | .01           | -8.94    | 0.000    | -.03                    | .01           | -4.56        | 0.000    | -.14                       | .04           | -3.55    | 0.000    |
| Age                                                      | -.05          | .05           | -0.93    | 0.352    | -.00              | .00           | -1.11    | 0.265    | -.01                    | .00           | -1.70        |          | -.14                       | .04           | -3.94    | 0.000    |
|                                                          |               |               |          |          |                   |               |          |          |                         |               |              | 0.089    |                            |               |          |          |
| Marital status (ref. Married)                            |               |               |          |          |                   |               |          |          |                         |               |              |          |                            |               |          |          |
| - divorced                                               | -1.58         | 1.24          | -1.27    | 0.202    | -.03              | .08           | -0.35    | 0.723    | .11                     | .10           | 1.14         | 0.254    | -.13                       | .70           | -0.18    | 0.856    |
| - widowed                                                | -2.71         | 2.17          | -1.25    | .212     | .26               | .15           | 1.77     | 0.076    | .02                     | .09           | 0.28         | 0.781    | 1.18                       | .82           | 1.44     | 0.149    |
| - single                                                 | -2.15         | 1.17          | -1.84    | .066     | .13               | .11           | 1.23     | 0.219    | .23                     | .10           | 2.24         | 0.025    | -.28                       | .78           | -0.35    | 0.725    |
| Highest educational degree (ref. upper secondary school) |               |               |          |          |                   |               |          |          |                         |               |              |          |                            |               |          |          |
| - lower secondary school                                 | -.91          | 1.06          | -.85     | .393     | -.03              | .09           | -0.31    | 0.756    | .01                     | .08           | 0.16         | 0.872    | -1.01                      | .61           | -1.67    | 0.095    |
| - intermediate secondary school                          | 1.05          | .92           | 1.14     | .252     | -.02              | .07           | -0.24    | 0.814    | .09                     | .07           | 1.33         | 0.185    | -.09                       | .53           | -0.17    | 0.866    |
| - polytechnic secondary school                           | -.23          | 1.48          | -.16     | .874     | -.06              | .11           | -0.57    | 0.565    | -.01                    | .09           | -0.06        | 0.955    | -1.01                      | .78           | -1.30    | 0.195    |
| - qualification for applied                              | .14           | 1.28          | 0.11     | .913     | .17               | .10           | 1.70     | 0.090    | .15                     | .10           | 1.51         | 0.131    | .29                        | .76           | 0.38     | 0.703    |

|                                                                               |       |      |       |       |       |     |       |       |       |     |       |       |       |      |       |       |  |
|-------------------------------------------------------------------------------|-------|------|-------|-------|-------|-----|-------|-------|-------|-----|-------|-------|-------|------|-------|-------|--|
| upper<br>secondary<br>school                                                  |       |      |       |       |       |     |       |       |       |     |       |       |       |      |       |       |  |
| Employment status<br>(ref. employed (full-<br>time))                          |       |      |       |       |       |     |       |       |       |     |       |       |       |      |       |       |  |
| - employed<br>(part-time)                                                     | -0.51 | .99  | -0.51 | 0.607 | -0.00 | .08 | -0.03 | 0.972 | -0.02 | .07 | -0.24 | 0.811 | -0.73 | .50  | -1.45 | 0.148 |  |
| - marginally<br>employed                                                      | -4.07 | 1.79 | -2.27 | 0.023 | -0.14 | .14 | -1.00 | 0.315 | -0.25 | .13 | -1.98 | 0.048 | -0.97 | .72  | -1.34 | 0.181 |  |
| - retired                                                                     | -1.16 | 1.19 | -0.97 | 0.330 | -0.18 | .09 | -1.99 | 0.046 | -0.03 | .09 | -0.33 | 0.740 | .18   | .70  | 0.25  | 0.800 |  |
| - unemployed                                                                  | -0.64 | 1.54 | -0.42 | 0.677 | .01   | .10 | 0.06  | 0.953 | .32   | .12 | 2.68  | 0.007 | 1.44  | .86  | 1.67  | 0.094 |  |
| Living situation (ref.<br>living alone in private<br>household)               |       |      |       |       |       |     |       |       |       |     |       |       |       |      |       |       |  |
| - living together<br>with other ins<br>private<br>household                   | -1.14 | 1.20 | -0.95 | 0.342 | -0.01 | .09 | -0.10 | 0.916 | -0.06 | .08 | -0.75 | 0.452 | .19   | .65  | 0.30  | 0.763 |  |
| - living in<br>assisted<br>living/nursing<br>care<br>home/retiremen<br>t home | -6.09 | 2.32 | -2.62 | 0.009 | -0.27 | .13 | -2.04 | 0.042 | -0.60 | .23 | -2.67 | 0.008 | -1.00 | 1.42 | -0.71 | 0.479 |  |
| Children in one's<br>household (ref. None)                                    |       |      |       |       |       |     |       |       |       |     |       |       |       |      |       |       |  |
| - Yes, younger<br>than 14 years                                               | -2.01 | 1.20 | -1.68 | 0.093 | .02   | .10 | 0.15  | 0.881 | .19   | .12 | 1.63  | 0.104 | -1.02 | .69  | -1.49 | 0.137 |  |
| - Yes, between<br>14 and 18 years                                             | .55   | 1.08 | 0.51  | 0.613 | -0.01 | .09 | -0.07 | 0.947 | -0.06 | .07 | -0.90 | 0.369 | -0.06 | .66  | -0.09 | 0.932 |  |
| Self-rated health                                                             | -1.34 | .47  | -2.89 | 0.004 | -0.15 | .03 | -4.83 | 0.000 | -0.16 | .03 | -4.83 | 0.000 | -1.89 | .27  | -7.05 | 0.000 |  |

|                                          |       |      |      |       |      |     |      |       |      |     |      |       |       |      |      |       |
|------------------------------------------|-------|------|------|-------|------|-----|------|-------|------|-----|------|-------|-------|------|------|-------|
| Perceived danger for caregiver (oneself) | .76   | .42  | 1.82 | 0.069 | .05  | .03 | 1.70 | 0.089 | .08  | .03 | 2.45 |       | .22   | .26  | 0.84 | 0.400 |
| Perceived danger for care recipient      | .18   | .32  | 0.56 | 0.576 | .00  | .03 | 0.06 | 0.954 | .05  | .03 | 1.97 | 0.014 | .41   | .20  | 2.04 |       |
| Constant                                 | 17.46 | 4.57 | 3.82 | 0.000 | 3.28 | .33 | 9.95 | 0.000 | 2.04 | .34 | 5.95 | 0.000 | 18.23 | 2.72 | 6.69 | 0.042 |
| Observations                             | 387   |      |      |       | 398  |     |      |       |      |     | 387  |       |       |      |      | 389   |
|                                          |       |      |      |       |      |     |      |       |      |     |      |       |       |      |      | 0.000 |

*Note.* Structural equation analyses using full informal maximum likelihood estimation were conducted; unstandardized regression coefficients and robust standard errors are given. *Conspiracy mentality* (Range: 0-50), higher scores indicate higher conspiracy mentality; *burden* (BSFCs), Range: 0-30, higher scores indicate higher caregiver burden; *loneliness* (de Jong Gierveld Scale) Range: 1-4, higher scores indicate higher loneliness; *social exclusion* (Bude & Lantermann) scale Range: 1-4, higher scores indicate higher social exclusion; *depressive symptoms* (PHQ-9, Range: 0-27), higher scores indicate more depressive symptoms; *self-rated health* (Range 1-5), higher scores indicate better health; *social support* (Lubben's social network scale) Range: 0-30 (family and network scale Range: 0-15), higher scores indicate stronger social network and more social support; *perceived danger for oneself* (caregiver) and *for care recipient* (Range: 0-5), higher scores indicate higher levels of perceived danger Level of significance: \*\*\* p<0.001, \*\* p<0.01, \* p<0.05, + p<0.10
